# Supplementary material for: The Cross-Modal Effects of Sensory Deprivation on Spatial and Temporal Processes in Vision and Audition: A Systematic Review on Behavioral and Neuroimaging Research since 2000
Source: Hindawi journal article supplement (doi:10.1155/2019/9603469), 2019-12-02
Supplement: f1 [file 9603469.f1.pdf]

## 1 Supplementary Material

### 2 Table S1. Keywords and paired keywords for the systematic literature review.

| Impairment/Plasticity term |     | Addition         |
|----------------------------|-----|------------------|
| Cochlear implant           | AND | Vision           |
| Cochlear implant           | AND | Visual           |
| Hearing impairment         | AND | Visual           |
| Hearing impairment         | AND | Vision           |
| Deaf                       | AND | Seeing           |
| Deaf                       | AND | Visual           |
| Deaf                       | AND | Vision           |
| Auditory deprivation       | AND | Vision           |
| Deafness                   | AND | Visual           |
| Auditory impairment        | AND | Visual           |
| Auditory impairment        | AND | Vision           |
| Hearing aid                | AND | Vision           |
| Hearing aid                | AND | Visual           |
| Cataract                   | AND | Hearing          |
| Blind                      | AND | Hearing          |
| Blind                      | AND | Auditory         |
| Visual deprivation         | AND | Hearing          |
| Blindness                  | AND | Hearing          |
| Visual impairment          | AND | Hearing          |
| Blind                      | AND | Temporal cortex  |
| Blind                      | AND | Auditory cortex  |
| Hearing                    | AND | Occipital cortex |
| Hearing                    | AND | Visual cortex    |
| Deaf                       | AND | Occipital cortex |
| Deaf                       | AND | Visual cortex    |
| Cortical reorganization    | AND | Deaf             |
| Cortical reorganization    | AND | Blind            |
| Sensory deprivation        | AND | Plasticity       |
| Crossmodal reorganization  |     |                  |
| Cross modal reorganization |     |                  |
